# Supplementary material for: A Phase 2 Randomised Clinical Trial Assessing the Tolerability of Two Different Ratios of Medicinal Cannabis in Patients With High Grade Gliomas
Source: PubMed Central journal article supplement (PMC8176855; doi:10.3389/fonc.2021.649555), 2021-05-21
Supplement: DataSheet_1.pdf [file DataSheet_1.pdf]

## *Supplementary Material*

### **A PHASE 2 RANDOMISED, DOUBLE BLIND CLINICAL TRIAL ASSESSING THE TOLERABILITY OF TWO DIFFERENT RATIOS OF MEDICINAL CANNABIS IN PATIENTS WITH GLIOBLASTOMA MULTIFORME (GBM).**

Supplemental information

1. Retrospective data comparison
2. Scores of blood pathology
3. Score of treatment related toxicity

| RANO Criteria (Baseline to 12 weeks) | MC Group   | Retro Group |
|--------------------------------------|------------|-------------|
| Reduction in tumour size             | 8 (10.9%)  | 0 (0%)      |
| Stable disease                       | 25 (34.1%) | 29 (45%)    |
| Progressive disease                  | 20 (27.4%) | 34 (53%)    |

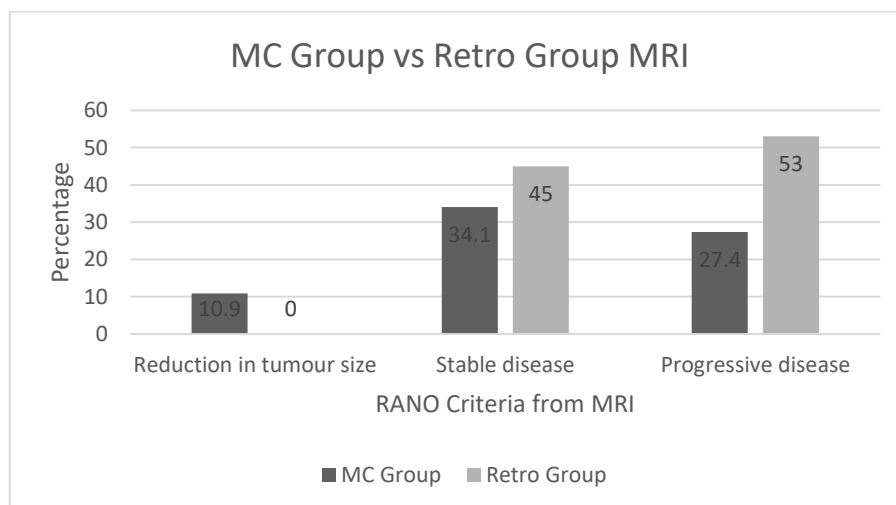

**Supplementary Figure 1: Comparison of MRI results after 12 weeks**

**Supplementary Table 1: Scores of blood pathology markers (GEE, paired t test for Mean and SD)**

No correlation between those who were taking phenytoin and carbinamine with blood levels.

| Outcome                       |       | Baseline         | Week 4           | Week 8           | Week 12          | p- value |
|-------------------------------|-------|------------------|------------------|------------------|------------------|----------|
|                               |       | <i>Mean (SD)</i> | <i>Mean (SD)</i> | <i>Mean (SD)</i> | <i>Mean (SD)</i> |          |
| <b>Sodium</b><br>(135-145)    | 1:1   | 142.3 (2.7)      | 142.0 (2.6)      | 141.6 (2.8)      | 142.1 (2.3)      | 0.235    |
|                               | 4:1   | 141.4 (2.6)      | 141.5 (2.0)      | 141.0 (1.9)      | 141.7 (1.4)      |          |
|                               | Total | 141.8 (2.8)      | 141.7 (2.3)      | 141.3 (2.4)      | 141.9 (1.8)      |          |
| <b>Potassium</b><br>(3.5-5.2) | 1:1   | 5.25 (6.7)       | 4.12 (0.3)       | 4.06 (0.4)       | 1.14 (0.4)       | 0.306    |
|                               | 4:1   | 4.23 (0.2)       | 4.10 (0.3)       | 4.06 (0.4)       | 3.97 (0.2)       |          |
|                               | Total | 4.75 (4.8)       | 4.11 (0.3)       | 4.06 (0.4)       | 4.05 (0.3)       |          |
| <b>Chloride</b><br>(95-110)   | 1:1   | 102.4 (3.2)      | 101.8 (2.7)      | 101.6 (2.8)      | 102.8 (2.1)      | 0.271    |
|                               | 4:1   | 101.5 (2.6)      | 101.7 (2.6)      | 101.0 (2.4)      | 101.6 (2.5)      |          |
|                               | Total | 102.0 (2.9)      | 101.8 (2.6)      | 101.3 (2.6)      | 102.2 (2.4)      |          |
| <b>HC03</b><br>(22-32)        | 1:1   | 26.27 (2.3)      | 25.42 (2.2)      | 25.6 (1.8)       | 24.5 (2.0)       | 0.067    |
|                               | 4:1   | 25.33 (2.2)      | 24.44 (2.2)      | 24.0 (4.4)       | 26.0 (2.0)       |          |
|                               | Total | 25.81 (2.3)      | 24.90 (2.2)      | 24.8 (3.5)       | 25.3 (2.1)       |          |
| <b>Urea</b><br>(4.0-9.0)      | 1:1   | 5.3 (1.4)        | 5.8 (1.5)        | 5.4 (1.8)        | 5.5 (1.5)        | 0.358    |
|                               | 4:1   | 5.5 (2.0)        | 5.6 (1.8)        | 5.4 (1.8)        | 5.1 (1.9)        |          |
|                               | Total | 5.4 (1.7)        | 5.7 (1.7)        | 5.4 (1.7)        | 5.3 (1.7)        |          |
| <b>Creatinine</b><br>(60-110) | 1:1   | 73 (22.6)        | 69.4 (19.8)      | 72.4 (16.4)      | 71.5 (18.1)      | 0.222    |
|                               | 4:1   | 72.5 (18.2)      | 70.0 (13.0)      | 71.7 (16.9)      | 70.2 (11.5)      |          |
|                               | Total | 72.7 (20.4)      | 69.7 (16.4)      | 72.0 (16.5)      | 70.8 (14.8)      |          |
| <b>EGFR</b><br>(>90)          | 1:1   | 86.6 (9.2)       | 86.3 (7.7)       | 86.3 (6.5)       | 86.2 (6.8)       | 0.387    |
|                               | 4:1   | 84.3 (9.9)       | 86.5 (5.6)       | 84.4 (10.1)      | 85.2 (7.2)       |          |
|                               | Total | 85.5 (9.6)       | 86.4 (6.7)       | 85.3 (8.6)       | 85.6 (7.0)       |          |
| <b>Glucose</b><br>(3.0-5.5)   | 1:1   | 5.5 (1.2)        | 5.2 (1.5)        | 5.0 (1.3)        | 5.4 (1.2)        | 0.323    |
|                               | 4:1   | 5.6 (1.6)        | 5.5 (1.3)        | 5.6 (2.1)        | 4.9 (0.8)        |          |
|                               | Total | 5.5 (1.4)        | 5.3 (1.4)        | 5.3 (1.8)        | 5.1 (1.0)        |          |
| <b>Bilirubin</b><br>(0-20)    | 1:1   | 8.2 (5.7)        | 7.6 (3.3)        | 9.1 (6.6)        | 7.4 (3.5)        | 0.149    |
|                               | 4:1   | 6.7 (4.3)        | 7.0 (4.3)        | 7.4 (5.7)        | 7.1 (4.4)        |          |
|                               | Total | 7.5 (5.1)        | 7.2 (3.8)        | 8.2 (6.7)        | 7.2 (4.0)        |          |
| <b>ALP</b><br>(30-110)        | 1:1   | 71.3 (26.5)      | 65.0 (19.6)      | 68.5 (18)        | 66.1 (15.2)      | 0.661    |
|                               | 4:1   | 72.6 (27.2)      | 71.4 (35.2)      | 67.3 (24)        | 71.4 (25.3)      |          |
|                               | Total | 71.9 (26.7)      | 68.5 (29.1)      | 67.8 (21)        | 68.8 (21.0)      |          |
| <b>GGT</b>                    | 1:1   | 40.2 (44.3)      | 33.0 (32.6)      | 38.0 (49)        | 28.9 (40.4)      |          |

|                |       |             |             |            |              |       |
|----------------|-------|-------------|-------------|------------|--------------|-------|
|                | 4:1   | 48.5 (51.8) | 42.4 (69.8) | 43.6 (65)  | 30.7 (31.5)  | 0.462 |
| (5-50)         | Total | 44.3 (48.0) | 38.1 (55.8) | 41.0 (58)  | 29.8 (35.6)  |       |
| <b>AST</b>     | 1:1   | 22.8 (14.3) | 20.2 (7.2)  | 22.9 (13)  | 19.3 (7.5)   |       |
|                | 4:1   | 22.1 (8.1)  | 20.9 (9.5)  | 20.1 (6.9) | 20.6 (7.4)   | 0.545 |
| (<36)          | Total | 22.5 (11.6) | 20.6 (8.4)  | 21.4 (10)  | 20.0 (7.4)   |       |
| <b>ALT</b>     | 1:1   | 32.4 (31.5) | 29.4 (24.1) | 30.8 (28)  | 24.0 (21.7)  |       |
|                | 4:1   | 29.6 (18.0) | 29.1 (23.8) | 26.8 (19)  | 25.7 (14.4)  | 0.570 |
| (<51)          | Total | 31.0 (25.6) | 29.2 (23.7) | 28.6 (24)  | 24.9 (18.0)  |       |
| <b>Protein</b> | 1:1   | 67.7 (5.1)  | 66.8 (4.2)  | 66.5 (4.0) | 67.0 (3.7)   |       |
|                | 4:1   | 68.8 (5.3)  | 67.6 (6.0)  | 68.3 (5.1) | 68.1 (5.1)   | 0.250 |
| (60-80)        | Total | 68.2 (5.2)  | 67.3 (5.2)  | 67.5 (4.7) | 67.6 (4.5)   |       |
| <b>Albumin</b> | 1:1   | 37.8 (7.1)  | 37.5 (5.6)  | 38.1 (3.6) | 39.5 (2.0)   |       |
|                | 4:1   | 38.8 (3.6)  | 37.8 (3.2)  | 39.5 (3.3) | 38.6 (3.6)   | 0.379 |
| (33-48)        | Total | 38.3 (5.6)  | 37.7 (4.4)  | 38.9 (3.5) | 39.1 (3.0)   |       |
| <b>CRP</b>     | 1:1   | 2.7 (3.8)   | 2.1 (2.4)   | 3.7 (7.1)  | 3.2 (5.8)    |       |
|                | 4:1   | 2.8 (4.2)   | 4.6 (7.3)   | 3.5 (6.4)  | 3.4 (4.6)    | 0.213 |
| (<3)           | Total | 2.8 (4.0)   | 3.5 (5.7)   | 3.6 (6.7)  | 3.3 (5.1)    |       |
| <b>Hb</b>      | 1:1   | 138.4 (15)  | 136.4 (18)  | 136.8 (19) | 134.1 (14.6) |       |
|                | 4:1   | 133.2 (13)  | 130.1 (14)  | 129.8 (12) | 127.9 (14.8) | 0.063 |
| (130-180)      | Total | 135.7 (14)  | 133.0 (16)  | 133.0 (15) | 130.9 (14.9) |       |
| <b>WBC</b>     | 1:1   | 6.3 (3.1)   | 6.6 (3)     | 6.1 (2.9)  | 5.3 (1.9)    |       |
|                | 4:1   | 5.5 (3.0)   | 5.5 (2)     | 5.2 (2.0)  | 5.0 (2.0)    | 0.189 |
| (3.50-11.00)   | Total | 5.9 (3.1)   | 6.0 (2)     | 5.6 (2.4)  | 5.1 (2.0)    |       |
| <b>PLT</b>     | 1:1   | 197.9 (64)  | 217.5 (71)  | 198.5 (65) | 202.1 (77.5) |       |
|                | 4:1   | 190.5 (93)  | 195.1 (91)  | 189.7 (69) | 179.0 (76.3) | 0.423 |
| (150-450)      | Total | 194.51(80)  | 205.5 (82)  | 193.8 (67) | 190.3 (76.9) |       |
| <b>RBC</b>     | 1:1   | 4.4 (0.4)   | 4.2 (0.8)   | 4.4 (0.6)  | 4.2 (0.5)    |       |
|                | 4:1   | 4.2 (0.5)   | 4.2 (0.6)   | 4.1 (0.5)  | 4.1 (0.6)    | 0.169 |
| (4.50-6.50)    | Total | 4.3 (0.5)   | 4.2 (0.7)   | 4.3 (0.6)  | 4.1 (0.5)    |       |
| <b>HCT</b>     | 1:1   | 0.40 (0)    | 0.39 (0)    | 0.40 (0)   | 0.39 (0)     |       |
|                | 4:1   | 0.39 (0)    | 0.38 (0)    | 0.38 (0)   | 0.38 (0)     | 0.066 |
| (0.40-0.54)    | Total | 0.39 (0)    | 0.38 (0)    | 0.39 (0)   | 0.39 (0)     |       |
| <b>MCV</b>     | 1:1   | 91.9 (4.3)  | 91.8 (4.8)  | 91.5 (4.8) | 93.5 (4.5)   |       |
|                | 4:1   | 88.2 (17)   | 92.6 (5.8)  | 93.4 (6.6) | 94.7 (7.0)   | 0.875 |
| (80-100)       | Total | 90.0 (12)   | 92.2 (5.3)  | 92.5 (5.8) | 94.1 (5.9)   |       |
| <b>MCH</b>     | 1:1   | 31.2 (1.7)  | 31.3 (1.9)  | 30.9 (2.2) | 31.3 (1.7)   |       |
|                | 4:1   | 31.2 (2.3)  | 30.4 (4.3)  | 31.1 (2.8) | 31.4 (2.6)   | 0.277 |

Supplementary Material

|                    |       |             |             |            |              |       |
|--------------------|-------|-------------|-------------|------------|--------------|-------|
| (26.5-33.0)        | Total | 31.2 (2.0)  | 30.8 (3.4)  | 31.0 (2.5) | 31.4 (2.2)   |       |
| <b>MCHC</b>        | 1:1   | 339.9 (12)  | 340.6 (13)  | 334.8 (23) | 335.3 (11.6) | 0.644 |
|                    | 4:1   | 338.8 (9)   | 337.0 (12)  | 332.9 (12) | 331.8 (9.6)  |       |
| (310-360)          | Total | 339.8 (10)  | 338.7 (13)  | 333.8 (18) | 333.5 (10.6) |       |
| <b>RDW_CV</b>      | 1:1   | 13.4 (0.8)  | 13.9 (1.2)  | 13.9 (1.3) | 13.6 (1.1)   | 0.162 |
|                    | 4:1   | 14.0 (1.2)  | 14.2 (1.6)  | 13.8 (1.3) | 13.6 (1.2)   |       |
| (12.0-14.5)        | Total | 13.8 (1.1)  | 14.0 (1.4)  | 13.8 (1.3) | 13.6 (1.1)   |       |
| <b>RDWSD</b>       | 1:1   | 45.06 (2.8) | 46.32 (4.3) | 45.9 (4.3) | 46.4 (4.7)   | 0.059 |
|                    | 4:1   | 47.10 (5.5) | 48.01 (6.6) | 47.1 (6.0) | 46.7 (5.0)   |       |
| (38.0-48.0)        | Total | 46.11 (4.5) | 47.22 (5.7) | 46.5 (5.3) | 46.6 (4.8)   |       |
| <b>MPV</b>         | 1:1   | 10.56 (1)   | 10.56 (1)   | 10.5 (1.0) | 10.7 (1.0)   | 0.162 |
|                    | 4:1   | 10.30 (1)   | 10.30 (1)   | 10.4 (0.8) | 10.6 (0.8)   |       |
| (7.4-11.7)         | Total | 10.43 (1)   | 10.43 (1)   | 10.4 (0.9) | 10.6 (0.9)   |       |
| <b>Neutrophil</b>  | 1:1   | 6.37 (12)   | 6.67 (12.6) | 4.25 (2.6) | 3.68 (1.7)   | 0.259 |
|                    | 4:1   | 3.94 (2.7)  | 3.94 (2.7)  | 3.74 (1.7) | 3.36 (1.6)   |       |
| (1.7-7.0)          | Total | 5.27 (9.0)  | 5.27 (9.0)  | 3.98 (2.2) | 3.52 (1.6)   |       |
| <b>Lymphocytes</b> | 1:1   | 0.35 (1.4)  | 1.35 (1.4)  | 1.28 (0.7) | 1.10 (0.5)   | 0.153 |
|                    | 4:1   | 1.10 (0.5)  | 1.10 (0.5)  | 1.08 (0.5) | 1.20 (0.5)   |       |
| (1.5-4.0)          | Total | 1.22 (1.0)  | 1.22 (1.0)  | 1.17 (0.6) | 1.15 (0.5)   |       |
| <b>Monocyte</b>    | 1:1   | 0.47 (0.7)  | 0.47 (0.7)  | 0.39 (0.1) | 0.36 (0.1)   | 0.165 |
|                    | 4:1   | 0.37 (0.2)  | 0.37 (0.2)  | 0.32 (0.1) | 0.34 (0.1)   |       |
| (0.1-0.8)          | Total | 0.42 (0.5)  | 0.42 (0.5)  | 0.36 (0.1) | 0.35 (0.1)   |       |
| <b>Eosinophil</b>  | 1:1   | 0.25 (0.7)  | 0.25 (0.7)  | 0.16 (0.2) | 0.16 (0.1)   | 0.153 |
|                    | 4:1   | 0.09 (0.1)  | 0.09 (0.1)  | 0.10 (0.1) | 0.10 (0.0)   |       |
| (0.04-0.44)        | Total | 0.17 (0.5)  | 0.17 (0.5)  | 0.13 (0.1) | 0.13 (0.1)   |       |
| <b>Basophil</b>    | 1:1   | 0.02 (0.0)  | 0.02 (0.0)  | 0.01 (0.0) | 0.02 (0.0)   | 0.907 |
|                    | 4:1   | 0.01 (0.0)  | 0.01 (0.0)  | 0.02 (0.0) | 0.02 (0.0)   |       |
| (0.0-0.2)          | Total | 0.01 (0.0)  | 0.01 (0.0)  | 0.02 (0.0) | 0.02 (0.0)   |       |

| Outcome              |       | Baseline         | Week 4           | Week 8           | Week 12          |
|----------------------|-------|------------------|------------------|------------------|------------------|
|                      |       | <i>Mean (SD)</i> | <i>Mean (SD)</i> | <i>Mean (SD)</i> | <i>Mean (SD)</i> |
| <b>Phenytoin</b>     | 1:1   | 8.9 (11.45)      | 4.1              | 10               | N/A              |
|                      | 4:1   | 0.8              | 1.1              | 1.9              | N/A              |
|                      | Total | 6.2              | 3.5              | 5.9              |                  |
| <b>Carbamazepine</b> | 1:1   | 2 (0)            | 1.6              | N/A              | N/A              |
|                      | 4:1   | 2 (0)            | 2                | N/A              | N/A              |
|                      | Total | 2 (0)            | 1.7              |                  |                  |

**Supplementary Table 2: Treatment related toxicity – NCI CTC**

Comparison of toxicity results between participants: (GEE, paired t test for Mean and SD)

| Outcome                         |       | Baseline         | Week 4           | Week 8           | Week 12          | p- value |
|---------------------------------|-------|------------------|------------------|------------------|------------------|----------|
|                                 |       | <i>Mean (SD)</i> | <i>Mean (SD)</i> | <i>Mean (SD)</i> | <i>Mean (SD)</i> |          |
| <b>Dry Mouth</b>                | 1:1   | 0.63 (0.96)      | 0.76 (0.80)      | 0.73 (0.89)      | 0.67 (0.90)      | 0.213    |
|                                 | 4:1   | 0.70 (0.9)       | 1.07 (0.97)      | 0.88 (0.97)      | 0.78 (0.95)      |          |
|                                 | Total | 0.67 (0.93)      | 0.92 (0.90)      | 0.81 (0.93)      | 0.73 (0.92)      |          |
| <b>Difficulty swallowing</b>    | 1:1   | 0.17 (0.49)      | 0.28 (0.60)      | 0.23 (0.55)      | 0.17 (0.39)      | 0.387    |
|                                 | 4:1   | 0.19 (0.39)      | 0.37 (0.66)      | 0.30 (0.57)      | 0.28 (0.59)      |          |
|                                 | Total | 0.18 (0.44)      | 0.32 (0.63)      | 0.27 (0.56)      | 0.23 (0.50)      |          |
| <b>Mouth sores</b>              | 1:1   | 0.09 (0.37)      | 0.05 (0.22)      | 0.11 (0.32)      | 0.25 (0.58)      | 0.626    |
|                                 | 4:1   | 0.14 (0.47)      | 0.17 (0.44)      | 0.05 (0.33)      | 0.25 (0.70)      |          |
|                                 | Total | 0.12 (0.42)      | 0.11 (0.35)      | 0.08 (0.32)      | 0.25 (0.63)      |          |
| <b>Mouth sores interference</b> | 1:1   | 0.14 (0.57)      | 0.02 (0.16)      | 0.08 (0.28)      | 0.14 (0.60)      | 0.662    |
|                                 | 4:1   | 0.07 (0.46)      | 0.00 (0.00)      | 0.08 (0.50)      | 0.18 (0.68)      |          |
|                                 | Total | 0.10 (0.51)      | 0.01 (0.11)      | 0.08 (0.40)      | 0.16 (0.63)      |          |
| <b>Cheilosis</b>                | 1:1   | 0.04 (0.31)      | 0.05 (0.22)      | 0.14 (0.55)      | 0.07 (0.26)      | 0.842    |
|                                 | 4:1   | 0.11 (0.32)      | 0.10 (0.30)      | 0.08 (0.36)      | 0.03 (0.18)      |          |
|                                 | Total | 0.08 (0.32)      | 0.07 (0.26)      | 0.11 (0.46)      | 0.05 (0.22)      |          |
| <b>Voice changes</b>            | 1:1   | 0.14 (0.35)      | 0.05 (0.22)      | 0.08 (0.28)      | 0.17 (0.39)      | 0.195    |
|                                 | 4:1   | 0.19 (0.39)      | 0.15 (0.36)      | 0.16 (0.37)      | 0.22 (0.42)      |          |
|                                 | Total | 0.16 (0.37)      | 0.10 (0.30)      | 0.12 (0.33)      | 0.20 (0.40)      |          |
| <b>Hoarseness</b>               | 1:1   | 0.19 (0.45)      | 0.12 (0.40)      | 0.17 (0.38)      | 0.28 (0.53)      | 0.350    |
|                                 | 4:1   | 0.40 (0.79)      | 0.20 (0.40)      | 0.16 (0.50)      | 0.28 (0.71)      |          |
|                                 | Total | 0.30 (0.65)      | 0.16 (0.40)      | 0.17 (0.44)      | 0.28 (0.62)      |          |
| <b>Taste changes</b>            | 1:1   | 0.21 (0.41)      | 0.28 (0.64)      | 0.32 (0.68)      | 0.17 (0.47)      | 0.152    |
|                                 | 4:1   | 0.38 (0.69)      | 0.32 (0.69)      | 0.55 (0.84)      | 0.50 (0.92)      |          |
|                                 | Total | 0.30 (0.57)      | 0.30 (0.66)      | 0.44 (0.77)      | 0.33 (0.74)      |          |
| <b>Reduced appetite</b>         | 1:1   | 0.58 (0.83)      | 0.54 (0.75)      | 0.73 (0.93)      | 0.42 (0.69)      | 0.684    |
|                                 | 4:1   | 0.59 (0.85)      | 0.67 (0.97)      | 0.80 (1.23)      | 0.60 (0.78)      |          |
|                                 | Total | 0.59 (0.84)      | 0.61 (0.86)      | 0.77 (1.09)      | 0.51 (0.73)      |          |
| <b>Appetite interference</b>    | 1:1   | 0.29 (0.64)      | 0.23 (0.54)      | 0.37 (0.83)      | 0.28 (0.65)      | 0.515    |
|                                 | 4:1   | 0.21 (0.47)      | 0.13 (0.52)      | 0.32 (0.58)      | 0.37 (0.74)      |          |
|                                 | Total | 0.25 (0.55)      | 0.18 (0.53)      | 0.34 (0.71)      | 0.32 (0.69)      |          |
| <b>Nausea</b>                   | 1:1   | 0.65 (0.79)      | 0.53 (0.82)      | 0.79 (1.12)      | 0.92 (1.29)      |          |

|                            |       |             |             |             |             |       |     |
|----------------------------|-------|-------------|-------------|-------------|-------------|-------|-----|
|                            | 4:1   | 0.57 (0.88) | 0.75 (0.98) | 0.91 (0.96) | 0.59 (0.93) | 0.958 |     |
|                            | Total | 0.61 (0.83) | 0.64 (0.90) | 0.85 (1.03) | 0.75 (1.13) |       |     |
| <b>Nausea severity</b>     | 1:1   | 0.48 (0.63) | 0.47 (0.72) | 0.52 (0.74) | 0.57 (0.79) |       |     |
|                            | 4:1   | 0.45 (0.77) | 0.62 (1.00) | 0.83 (0.87) | 0.60 (0.99) | 0.448 |     |
|                            | Total | 0.46 (0.70) | 0.55 (0.87) | 0.68 (0.82) | 0.58 (0.88) |       |     |
| <b>Vomiting</b>            | 1:1   | 0.19 (0.55) | 0.23 (0.53) | 0.14 (0.50) | 0.25 (0.64) |       |     |
|                            | 4:1   | 0.19 (0.45) | 0.12 (0.33) | 0.19 (0.52) | 0.17 (0.47) | 0.551 |     |
|                            | Total | 0.19 (0.50) | 0.17 (0.44) | 0.17 (0.50) | 0.21 (0.56) |       |     |
| <b>Vomiting severity</b>   | 1:1   | 0.17 (0.49) | 0.23 (0.58) | 0.08 (0.37) | 0.28 (0.65) |       |     |
|                            | 4:1   | 0.16 (0.48) | 0.15 (0.42) | 0.20 (0.53) | 0.11 (0.42) | 0.606 |     |
|                            | Total | 0.16 (0.48) | 0.19 (0.51) | 0.14 (0.46) | 0.20 (0.55) |       |     |
| <b>Heart burn</b>          | 1:1   | 0.43 (0.70) | 0.38 (0.81) | 0.29 (0.57) | 0.32 (0.77) |       |     |
|                            | 4:1   | 0.35 (0.61) | 0.52 (0.87) | 0.55 (0.73) | 0.35 (0.67) | 0.412 |     |
|                            | Total | 0.39 (0.66) | 0.45 (0.84) | 0.42 (0.67) | 0.33 (0.72) |       |     |
| <b>Heart burn severity</b> | 1:1   | 0.29 (0.51) | 0.30 (0.73) | 0.24 (0.50) | 0.21 (0.56) |       |     |
|                            | 4:1   | 0.30 (0.60) | 0.40 (0.70) | 0.41 (0.60) | 0.25 (0.51) | 0.350 |     |
|                            | Total | 0.30 (0.55) | 0.35 (0.71) | 0.33 (0.56) | 0.23 (0.53) |       |     |
| <b>Gas</b>                 | 1:1   | 0.09 (0.30) | 0.15 (0.36) | 0.26 (0.51) | 0.17 (0.39) |       |     |
|                            | 4:1   | 0.16 (0.37) | 0.25 (0.43) | 0.05 (0.23) | 0.17 (0.39) | 0.848 |     |
|                            | Total | 0.13 (0.34) | 0.20 (0.40) | 0.15 (0.40) | 0.17 (0.38) |       |     |
| <b>Bloating</b>            | 1:1   | 0.56 (0.86) | 0.36 (0.75) | 0.73 (0.96) | 0.53 (0.74) |       |     |
|                            | 4:1   | 0.78 (1.11) | 0.80 (1.18) | 0.66 (1.01) | 0.35 (0.78) | 0.209 |     |
|                            | Total | 0.67 (1.00) | 0.58 (1.01) | 0.70 (0.98) | 0.44 (0.76) |       |     |
| <b>Bloating severity</b>   | 1:1   | 0.35 (0.57) | 0.35 (0.70) | 0.35 (0.59) | 0.32 (0.47) |       |     |
|                            | 4:1   | 0.65 (0.85) | 0.62 (0.89) | 0.52 (0.73) | 0.25 (0.64) | 0.034 | 4:1 |
|                            | Total | 0.50 (0.74) | 0.49 (0.81) | 0.44 (0.67) | 0.28 (0.56) |       |     |
| <b>Hiccups</b>             | 1:1   | 0.32 (0.65) | 0.42 (0.68) | 0.47 (0.86) | 0.50 (0.83) |       |     |
|                            | 4:1   | 0.38 (0.79) | 0.57 (0.90) | 0.55 (0.99) | 0.28 (0.59) | 0.743 |     |
|                            | Total | 0.35 (0.72) | 0.50 (0.80) | 0.51 (0.92) | 0.39 (0.73) |       |     |
| <b>Hiccups severity</b>    | 1:1   | 0.25 (0.58) | 0.26 (0.50) | 0.35 (0.64) | 0.42 (0.69) |       |     |
|                            | 4:1   | 0.21 (0.51) | 0.35 (0.69) | 0.38 (0.72) | 0.21 (0.49) | 0.930 |     |
|                            | Total | 0.23 (0.55) | 0.30 (0.60) | 0.37 (0.68) | 0.32 (0.60) |       |     |
| <b>Constipation</b>        | 1:1   | 0.67 (0.82) | 0.41 (0.71) | 0.70 (1.08) | 0.50 (0.69) |       |     |
|                            | 4:1   | 0.61 (0.93) | 0.77 (0.91) | 0.41 (0.69) | 0.64 (0.86) | 0.660 |     |
|                            | Total | 0.64 (0.88) | 0.59 (0.84) | 0.55 (0.91) | 0.57 (0.78) |       |     |

|                                         |       |             |             |             |             |       |     |
|-----------------------------------------|-------|-------------|-------------|-------------|-------------|-------|-----|
| <b>Diarrhoea</b>                        | 1:1   | 0.39 (0.73) | 0.36 (0.71) | 0.61 (0.77) | 0.53 (0.69) | 0.376 |     |
|                                         | 4:1   | 0.54 (0.73) | 0.50 (0.84) | 0.55 (0.96) | 0.64 (1.06) |       |     |
|                                         | Total | 0.46 (0.73) | 0.43 (0.78) | 0.58 (0.87) | 0.58 (0.88) |       |     |
| <b>Ab Pain Frequency</b>                | 1:1   | 0.53 (0.89) | 0.41 (0.81) | 0.47 (.066) | 0.21 (0.49) | 0.217 |     |
|                                         | 4:1   | 0.52 (0.83) | 0.62 (0.83) | 0.69 (0.95) | 0.32 (0.66) |       |     |
|                                         | Total | 0.53 (0.86) | 0.51 (0.82) | 0.58 (0.82) | 0.26 (0.58) |       |     |
| <b>Ab pain severity</b>                 | 1:1   | 0.41 (0.66) | 0.30 (0.56) | 0.44 (0.22) | 0.25 (0.51) | 0.267 |     |
|                                         | 4:1   | 0.47 (0.70) | 0.47 (0.71) | 0.50 (0.25) | 0.33 (0.73) |       |     |
|                                         | Total | 0.44 (0.68) | 0.39 (0.64) | 0.47 (0.31) | 0.29 (0.62) |       |     |
| <b>Ab pain interference</b>             | 1:1   | 0.12 (0.39) | 0.15 (0.53) | 0.20 (0.47) | 0.17 (0.61) | 0.685 |     |
|                                         | 4:1   | 0.11 (0.39) | 0.23 (0.66) | 0.25 (0.55) | 0.21 (0.49) |       |     |
|                                         | Total | 0.12 (0.39) | 0.19 (0.60) | 0.22 (0.51) | 0.19 (0.55) |       |     |
| <b>Faecal incontinence frequency</b>    | 1:1   | 0.10 (0.30) | 0.12 (0.46) | 0.17 (0.52) | 0.03 (0.18) | 0.785 |     |
|                                         | 4:1   | 0.07 (0.26) | 0.10 (0.37) | 0.13 (0.48) | 0.28 (0.65) |       |     |
|                                         | Total | 0.08 (0.28) | 0.11 (0.42) | 0.15 (0.50) | 0.16 (0.49) |       |     |
| <b>Faecal incontinence interference</b> | 1:1   | 0.04 (0.21) | 0.08 (0.27) | 0.05 (0.23) | 0.17 (0.54) | 0.925 |     |
|                                         | 4:1   | 0.02 (0.15) | 0.07 (0.34) | 0.08 (0.28) | 0.17 (0.47) |       |     |
|                                         | Total | 0.03 (0.18) | 0.07 (0.31) | 0.07 (0.25) | 0.17 (0.50) |       |     |
| <b>SOB severity</b>                     | 1:1   | 0.22 (0.53) | 0.15 (0.43) | 0.20 (0.47) | 0.25 (0.51) | 0.012 | 4:1 |
|                                         | 4:1   | 0.52 (0.83) | 0.52 (0.93) | 0.50 (0.77) | 0.32 (0.66) |       |     |
|                                         | Total | 0.37 (0.71) | 0.34 (0.74) | 0.35 (0.66) | 0.28 (0.59) |       |     |
| <b>SOB interference</b>                 | 1:1   | 0.19 (0.55) | 0.15 (0.43) | 0.15 (0.44) | 0.10 (0.41) | 0.037 | 4:1 |
|                                         | 4:1   | 0.42 (0.83) | 0.35 (0.66) | 0.33 (0.79) | 0.28 (0.65) |       |     |
|                                         | Total | 0.31 (0.71) | 0.25 (0.56) | 0.24 (0.65) | 0.19 (0.55) |       |     |
| <b>Cough severity</b>                   | 1:1   | 0.21 (0.47) | 0.20 (0.46) | 0.23 (0.55) | 0.14 (0.44) | 0.494 |     |
|                                         | 4:1   | 0.28 (0.59) | 0.30 (0.60) | 0.19 (0.46) | 0.32 (0.86) |       |     |
|                                         | Total | 0.25 (0.53) | 0.25 (0.54) | 0.21 (0.50) | 0.23 (0.68) |       |     |
| <b>Cough interference</b>               | 1:1   | 0.09 (0.30) | 0.13 (0.54) | 0.09 (0.29) | 0.00 (0.00) | 0.237 |     |
|                                         | 4:1   | 0.11 (0.50) | 0.13 (0.34) | 0.13 (0.35) | 0.32 (0.86) |       |     |
|                                         | Total | 0.10 (0.41) | 0.13 (0.44) | 0.11 (0.32) | 0.16 (0.62) |       |     |
| <b>Wheezing</b>                         | 1:1   | 0.12 (0.39) | 0.05 (0.22) | 0.00 (0.00) | 0.03 (0.18) | 0.570 |     |
|                                         | 4:1   | 0.11 (0.39) | 0.05 (0.22) | 0.03 (0.17) | 0.14 (0.52) |       |     |
|                                         | Total | 0.12 (0.39) | 0.05 (0.22) | 0.01 (0.12) | 0.08 (0.39) |       |     |
| <b>Swelling frequency</b>               | 1:1   | 0.24 (0.62) | 0.26 (0.64) | 0.24 (0.61) | 0.17 (0.39) | 0.065 |     |
|                                         | 4:1   | 0.64 (1.07) | 0.51 (1.09) | 0.52 (1.05) | 0.23 (0.51) |       |     |
|                                         | Total | 0.44 (0.90) | 0.38 (0.90) | 0.39 (0.87) | 0.20 (0.45) |       |     |



|                                     |       |             |             |             |             |       |     |
|-------------------------------------|-------|-------------|-------------|-------------|-------------|-------|-----|
| <b>Swelling severity</b>            | 1:1   | 0.19 (0.55) | 0.23 (0.54) | 0.17 (0.45) | 0.17 (0.47) | 0.122 |     |
|                                     | 4:1   | 0.47 (0.86) | 0.40 (0.77) | 0.33 (0.67) | 0.17 (0.39) |       |     |
|                                     | Total | 0.33 (0.73) | 0.32 (0.67) | 0.25 (0.58) | 0.17 (0.43) |       |     |
| <b>Swelling interference</b>        | 1:1   | 0.07 (0.46) | 0.05 (0.22) | 0.05 (0.23) | 0.07 (0.05) | 0.038 |     |
|                                     | 4:1   | 0.33 (0.12) | 0.17 (0.54) | 0.50 (1.74) | 0.07 (0.04) |       |     |
|                                     | Total | 0.20 (0.07) | 0.11 (0.42) | 0.28 (1.27) | 0.07 (0.03) |       |     |
| <b>Heart palpitations frequency</b> | 1:1   | 0.12 (0.45) | 0.26 (0.60) | 0.32 (0.68) | 0.32 (0.61) | 0.956 |     |
|                                     | 4:1   | 0.28 (0.67) | 0.20 (0.51) | 0.22 (0.54) | 0.21 (0.56) |       |     |
|                                     | Total | 0.20 (0.57) | 0.23 (0.55) | 0.27 (0.61) | 0.26 (0.58) |       |     |
| <b>Heart palpitations severity</b>  | 1:1   | 0.07 (0.26) | 0.15 (0.36) | 0.32 (0.57) | 0.25 (0.51) | 0.626 |     |
|                                     | 4:1   | 0.21 (0.08) | 0.25 (0.63) | 0.27 (0.51) | 0.14 (0.35) |       |     |
|                                     | Total | 0.14 (0.04) | 0.20 (0.51) | 0.28 (0.54) | 0.19 (0.44) |       |     |
| <b>Rash</b>                         | 1:1   | 0.07 (0.26) | 0.07 (0.27) | 0.05 (0.23) | 0.10 (0.31) | 0.324 |     |
|                                     | 4:1   | 0.04 (0.21) | 0.15 (0.36) | 0.19 (0.40) | 0.14 (0.35) |       |     |
|                                     | Total | 0.06 (0.23) | 0.11 (0.32) | 0.12 (0.33) | 0.12 (0.33) |       |     |
| <b>Skin dryness</b>                 | 1:1   | 0.39 (0.70) | 0.42 (0.72) | 0.44 (0.70) | 0.32 (0.66) | 0.034 | 4:1 |
|                                     | 4:1   | 0.69 (0.86) | 0.72 (0.98) | 0.66 (0.89) | 0.71 (0.89) |       |     |
|                                     | Total | 0.54 (0.80) | 0.57 (0.87) | 0.55 (0.81) | 0.51 (0.80) |       |     |
| <b>Acne</b>                         | 1:1   | 0.21 (0.52) | 0.02 (0.16) | 0.05 (0.23) | 0.14 (0.53) | 0.442 |     |
|                                     | 4:1   | 0.14 (0.35) | 0.10 (0.30) | 0.22 (0.63) | 0.17 (0.47) |       |     |
|                                     | Total | 0.18 (0.44) | 0.06 (0.24) | 0.14 (0.49) | 0.16 (0.50) |       |     |
| <b>Hair loss</b>                    | 1:1   | 0.41 (0.77) | 0.13 (0.34) | 0.23 (0.60) | 0.25 (0.58) | 0.621 |     |
|                                     | 4:1   | 0.35 (0.75) | 0.17 (0.54) | 0.36 (0.76) | 0.32 (0.81) |       |     |
|                                     | Total | 0.38 (0.76) | 0.15 (0.45) | 0.30 (0.68) | 0.28 (0.70) |       |     |
| <b>Itching</b>                      | 1:1   | 0.31 (0.72) | 0.26 (0.55) | 0.32 (0.53) | 0.32 (0.72) | 0.089 |     |
|                                     | 4:1   | 0.47 (0.86) | 0.53 (0.78) | 0.50 (0.84) | 0.60 (0.78) |       |     |
|                                     | Total | 0.39 (0.79) | 0.40 (0.69) | 0.41 (0.71) | 0.46 (0.76) |       |     |
| <b>Hives</b>                        | 1:1   | 0.07 (0.26) | 0.02 (0.16) | 0.08 (0.28) | 0.07 (0.26) | 0.275 |     |
|                                     | 4:1   | 0.07 (0.26) | 0.15 (0.36) | 0.11 (0.31) | 0.10 (0.31) |       |     |
|                                     | Total | 0.07 (0.26) | 0.08 (0.28) | 0.10 (0.30) | 0.08 (0.28) |       |     |
| <b>Hand foot syndrome</b>           | 1:1   | 0.07 (0.34) | 0.02 (0.16) | 0.02 (0.17) | 0.10 (0.31) | 0.984 |     |
|                                     | 4:1   | 0.04 (0.21) | 0.02 (0.15) | 0.02 (0.16) | 0.14 (0.44) |       |     |
|                                     | Total | 0.06 (0.28) | 0.02 (0.15) | 0.02 (0.16) | 0.12 (0.38) |       |     |
| <b>Nail loss</b>                    | 1:1   | 0.00 (0.00) | 0.02 (0.16) | 0.02 (0.17) | 0.00 (0.00) | 0.427 |     |
|                                     | 4:1   | 0.04 (0.03) | 0.02 (0.15) | 0.00 (0.00) | 0.03 (0.18) |       |     |

|                                           |       |             |             |             |             |       |     |
|-------------------------------------------|-------|-------------|-------------|-------------|-------------|-------|-----|
|                                           | Total | 0.02 (0.01) | 0.02 (0.15) | 0.01 (0.11) | 0.01 (0.13) |       |     |
| <b>Nail ridging</b>                       | 1:1   | 0.12 (0.33) | 0.10 (0.31) | 0.11 (0.32) | 0.10 (0.31) | 0.908 |     |
|                                           | 4:1   | 0.11 (0.32) | 0.10 (0.30) | 0.08 (0.28) | 0.21 (0.41) |       |     |
|                                           | Total | 0.12 (0.32) | 0.10 (0.30) | 0.10 (0.30) | 0.16 (0.37) |       |     |
| <b>Nail dis-colouration</b>               | 1:1   | 0.02 (0.15) | 0.00 (0.00) | 0.05 (0.23) | 0.10 (0.31) | 0.300 |     |
|                                           | 4:1   | 0.07 (0.26) | 0.05 (0.22) | 0.11 (0.31) | 0.10 (0.31) |       |     |
|                                           | Total | 0.04 (0.21) | 0.02 (0.15) | 0.08 (0.28) | 0.10 (0.31) |       |     |
| <b>Phyto-sensitivity</b>                  | 1:1   | 0.14 (0.35) | 0.02 (0.16) | 0.02 (0.17) | 0.07 (0.26) | 0.404 |     |
|                                           | 4:1   | 0.04 (0.21) | 0.03 (0.22) | 0.05 (0.23) | 0.03 (0.18) |       |     |
|                                           | Total | 0.09 (0.29) | 0.02 (0.19) | 0.04 (0.20) | 0.05 (0.22) |       |     |
| <b>Bed sores</b>                          | 1:1   | 0.02 (0.15) | 0.02 (0.16) | 0.02 (0.02) | 0.00 (0.00) | 0.230 |     |
|                                           | 4:1   | 0.00 (0.00) | 0.00 (0.00) | 0.00 (0.00) | 0.00 (0.00) |       |     |
|                                           | Total | 0.01 (0.10) | 0.01 (0.11) | 0.01 (0.01) | 0.00 (0.00) |       |     |
| <b>Radiation skin reactions</b>           | 1:1   | 4.31 (1.57) | 0.35 (1.22) | 4.70 (1.19) | 4.57 (1.34) | 0.417 |     |
|                                           | 4:1   | 4.21 (1.68) | 0.00 (0.00) | 4.58 (1.40) | 4.39 (1.59) |       |     |
|                                           | Total | 4.26 (0.62) | 0.16 (0.86) | 4.64 (1.29) | 4.48 (1.46) |       |     |
| <b>Skin darkening</b>                     | 1:1   | 0.07 (0.26) | 0.02 (0.16) | 0.03 (0.17) | 0.12 (0.33) | 0.766 |     |
|                                           | 4:1   | 0.04 (0.21) | 0.02 (0.15) | 0.08 (0.36) | 0.03 (0.19) |       |     |
|                                           | Total | 0.06 (0.24) | 0.02 (0.15) | 0.05 (0.29) | 0.07 (0.27) |       |     |
| <b>Stretch marks</b>                      | 1:1   | 0.02 (0.15) | 0.02 (0.16) | 0.06 (0.24) | 0.07 (0.26) | 1.000 |     |
|                                           | 4:1   | 0.02 (0.15) | 0.05 (0.22) | 0.05 (0.33) | 0.03 (0.18) |       |     |
|                                           | Total | 0.02 (0.15) | 0.03 (0.19) | 0.05 (0.29) | 0.05 (0.22) |       |     |
| <b>Numbness and tingling severity</b>     | 1:1   | 0.39 (0.73) | 0.28 (0.68) | 0.36 (0.89) | 0.28 (0.65) | 0.076 |     |
|                                           | 4:1   | 0.76 (0.95) | 0.55 (0.74) | 0.55 (0.77) | 0.17 (0.39) |       |     |
|                                           | Total | 0.57 (0.87) | 0.41 (0.72) | 0.46 (0.83) | 0.23 (0.53) |       |     |
| <b>Numbness and tingling interference</b> | 1:1   | 0.26 (0.67) | 0.25 (0.63) | 0.28 (0.88) | 0.21 (0.62) | 0.637 |     |
|                                           | 4:1   | 0.33 (0.78) | 0.37 (0.70) | 0.33 (0.58) | 0.07 (0.26) |       |     |
|                                           | Total | 0.30 (0.72) | 0.31 (0.67) | 0.30 (0.73) | 0.14 (0.48) |       |     |
| <b>Dizziness severity</b>                 | 1:1   | 0.51 (0.63) | 0.43 (0.71) | 0.48 (0.71) | 0.46 (0.83) | 0.071 | 4:1 |
|                                           | 4:1   | 0.76 (0.95) | 0.80 (0.91) | 0.75 (0.99) | 0.46 (0.74) |       |     |
|                                           | Total | 0.63 (0.82) | 0.62 (0.83) | 0.62 (0.87) | 0.46 (0.78) |       |     |
| <b>Dizziness interference</b>             | 1:1   | 0.39 (0.58) | 0.28 (0.60) | 0.42 (0.75) | 0.50 (0.17) | 0.218 |     |
|                                           | 4:1   | 0.64 (0.98) | 0.42 (0.81) | 0.58 (0.87) | 0.37 (0.13) |       |     |
|                                           | Total | 0.51 (0.81) | 0.35 (0.71) | 0.50 (0.81) | 0.43 (0.10) |       |     |
| <b>Blurred vision severity</b>            | 1:1   | 0.48 (0.77) | 0.51 (0.96) | 0.45 (0.97) | 0.40 (0.93) | 0.452 |     |
|                                           | 4:1   | 0.66 (0.90) | 0.47 (0.84) | 0.58 (0.87) | 0.55 (0.80) |       |     |

|                                    |       |             |             |             |             |       |     |
|------------------------------------|-------|-------------|-------------|-------------|-------------|-------|-----|
|                                    | Total | 0.57 (0.84) | 0.49 (0.90) | 0.52 (0.91) | 0.48 (0.86) |       |     |
| <b>Blurred vision interference</b> | 1:1   | 0.32 (0.69) | 0.41 (0.93) | 0.36 (0.82) | 0.39 (0.91) | 0.292 |     |
|                                    | 4:1   | 0.54 (0.99) | 0.40 (0.70) | 0.58 (0.90) | 0.42 (0.83) |       |     |
|                                    | Total | 0.43 (0.86) | 0.40 (0.82) | 0.47 (0.86) | 0.41 (0.86) |       |     |
| <b>Flashing light severity</b>     | 1:1   | 0.04 (0.21) | 0.07 (0.26) | 0.18 (0.58) | 0.28 (0.53) | 0.320 |     |
|                                    | 4:1   | 0.19 (0.45) | 0.15 (0.36) | 0.25 (0.50) | 0.14 (0.35) |       |     |
|                                    | Total | 0.12 (0.36) | 0.11 (0.31) | 0.21 (0.53) | 0.21 (0.45) |       |     |
| <b>Visual floaters</b>             | 1:1   | 0.12 (0.33) | 0.13 (0.34) | 0.18 (0.39) | 0.28 (0.46) | 0.037 | 1:1 |
|                                    | 4:1   | 0.38 (0.49) | 0.35 (0.53) | 0.30 (0.52) | 0.21 (0.41) |       |     |
|                                    | Total | 0.25 (0.43) | 0.24 (0.46) | 0.24 (0.46) | 0.25 (0.43) |       |     |
| <b>Watery eyes severity</b>        | 1:1   | 0.17 (0.44) | 0.10 (0.30) | 0.42 (0.66) | 0.25 (0.52) | 0.700 |     |
|                                    | 4:1   | 0.28 (0.67) | 0.25 (0.58) | 0.27 (0.56) | 0.10 (0.31) |       |     |
|                                    | Total | 0.22 (0.57) | 0.17 (0.47) | 0.34 (0.61) | 0.18 (0.43) |       |     |
| <b>Watery eyes interference</b>    | 1:1   | 0.12 (0.39) | 0.07 (0.26) | 0.09 (0.29) | 0.18 (0.39) | 0.660 |     |
|                                    | 4:1   | 0.21 (0.64) | 0.12 (0.33) | 0.13 (0.35) | 0.00 (0.00) |       |     |
|                                    | Total | 0.16 (0.53) | 0.10 (0.30) | 0.11 (0.32) | 0.09 (0.29) |       |     |
| <b>Ringling in the ears</b>        | 1:1   | 0.34 (0.65) | 0.23 (0.53) | 0.30 (0.58) | 0.46 (0.74) | 0.581 |     |
|                                    | 4:1   | 0.45 (0.77) | 0.32 (0.65) | 0.30 (0.57) | 0.25 (0.51) |       |     |
|                                    | Total | 0.39 (0.71) | 0.27 (0.59) | 0.30 (0.57) | 0.35 (0.64) |       |     |
| <b>Concentration severity</b>      | 1:1   | 0.85 (0.90) | 0.71 (0.85) | 0.90 (1.02) | 0.71 (0.89) | 0.033 | 4:1 |
|                                    | 4:1   | 1.26 (1.08) | 1.07 (0.82) | 1.05 (1.04) | 1.00 (0.94) |       |     |
|                                    | Total | 1.06 (1.01) | 0.89 (0.85) | 0.98 (1.02) | 0.85 (0.92) |       |     |
| <b>Concentration frequency</b>     | 1:1   | 0.68 (0.81) | 0.50 (0.79) | 0.81 (1.13) | 0.75 (0.96) | 0.027 | 4:1 |
|                                    | 4:1   | 1.26 (1.26) | 1.00 (0.96) | 0.94 (0.95) | 0.75 (0.92) |       |     |
|                                    | Total | 0.97 (1.10) | 0.75 (0.91) | 0.88 (1.03) | 0.75 (0.93) |       |     |
| <b>Memory severity</b>             | 1:1   | 0.87 (0.82) | 0.75 (0.72) | 0.96 (0.99) | 0.89 (0.95) | 0.115 |     |
|                                    | 4:1   | 1.11 (1.19) | 1.05 (0.95) | 1.08 (1.02) | 1.07 (1.01) |       |     |
|                                    | Total | 1.00 (1.03) | 0.90 (0.86) | 1.02 (1.00) | 0.98 (0.98) |       |     |
| <b>Memory interference</b>         | 1:1   | 0.73 (0.74) | 0.48 (0.85) | 0.78 (0.94) | 0.78 (0.99) | 0.175 |     |
|                                    | 4:1   | 1.02 (1.07) | 0.87 (0.85) | 0.77 (0.84) | 0.71 (0.93) |       |     |
|                                    | Total | 0.87 (0.92) | 0.68 (0.87) | 0.77 (0.88) | 0.75 (0.95) |       |     |
| <b>General pain frequency</b>      | 1:1   | 0.87 (1.03) | 0.43 (0.68) | 0.53 (0.71) | 0.66 (0.87) | 0.192 |     |
|                                    | 4:1   | 0.97 (0.09) | 0.82 (1.08) | 0.82 (1.09) | 0.92 (1.35) |       |     |
|                                    | Total | 0.93 (1.05) | 0.63 (0.93) | 0.68 (0.94) | 0.80 (1.14) |       |     |
| <b>General pain severity</b>       | 1:1   | 0.70 (0.87) | 0.33 (0.57) | 0.69 (1.04) | 0.46 (0.57) | 0.511 |     |
|                                    | 4:1   | 0.78 (0.97) | 0.62 (0.83) | 0.58 (0.80) | 0.53 (0.92) |       |     |
|                                    | Total | 0.74 (0.92) | 0.48 (0.73) | 0.63 (0.92) | 0.50 (0.76) |       |     |

|                                  |       |             |             |             |             |        |     |
|----------------------------------|-------|-------------|-------------|-------------|-------------|--------|-----|
| <b>General pain interference</b> | 1:1   | 0.48 (0.89) | 0.23 (0.58) | 0.30 (0.63) | 0.32 (0.47) | 0.107  |     |
|                                  | 4:1   | 0.68 (0.96) | 0.52 (0.81) | 0.61 (0.96) | 0.42 (0.92) |        |     |
|                                  | Total | 0.58 (0.92) | 0.38 (0.72) | 0.46 (0.83) | 0.37 (0.72) |        |     |
| <b>Headache frequency</b>        | 1:1   | 0.92 (1.05) | 0.51 (0.68) | 0.81 (0.99) | 0.64 (0.73) | 0.258  |     |
|                                  | 4:1   | 1.07 (1.11) | 0.85 (1.02) | 0.75 (1.07) | 0.67 (0.90) |        |     |
|                                  | Total | 1.00 (1.08) | 0.68 (0.88) | 0.77 (1.03) | 0.66 (0.81) |        |     |
| <b>Headache severity</b>         | 1:1   | 0.80 (0.92) | 0.50 (0.78) | 0.66 (0.88) | 0.53 (0.57) | 0.717  |     |
|                                  | 4:1   | 0.80 (0.89) | 0.66 (0.92) | 0.61 (0.83) | 0.53 (0.69) |        |     |
|                                  | Total | 0.80 (0.90) | 0.58 (0.86) | 0.63 (0.85) | 0.53 (0.63) |        |     |
| <b>Headache interference</b>     | 1:1   | 0.55 (0.87) | 0.25 (0.55) | 0.32 (0.58) | 0.42 (0.63) | 0.593  |     |
|                                  | 4:1   | 0.54 (0.83) | 0.39 (0.67) | 0.52 (0.86) | 0.25 (0.58) |        |     |
|                                  | Total | 0.54 (0.84) | 0.32 (0.62) | 0.42 (0.73) | 0.33 (0.61) |        |     |
| <b>Muscle pain frequency</b>     | 1:1   | 0.85 (1.09) | 0.86 (1.25) | 0.54 (0.79) | 0.60 (0.78) | 0.161  |     |
|                                  | 4:1   | 1.14 (1.33) | 0.89 (1.07) | 0.88 (1.05) | 1.03 (1.31) |        |     |
|                                  | Total | 1.00 (0.22) | 0.88 (1.15) | 0.72 (0.94) | 0.81 (1.09) |        |     |
| <b>Muscle pain Severity</b>      | 1:1   | 0.60 (0.89) | 0.58 (0.73) | 0.50 (0.61) | 0.44 (0.50) | 0.121  |     |
|                                  | 4:1   | 0.85 (1.02) | 0.66 (0.86) | 0.68 (0.83) | 0.78 (0.91) |        |     |
|                                  | Total | 0.73 (0.96) | 0.62 (0.80) | 0.59 (0.73) | 0.61 (0.75) |        |     |
| <b>Muscle pain interference</b>  | 1:1   | 0.41 (0.83) | 0.29 (0.57) | 0.35 (0.59) | 0.25 (0.44) | 0.019  | 4:1 |
|                                  | 4:1   | 0.83 (1.08) | 0.53 (0.96) | 0.51 (0.75) | 0.57 (0.92) |        |     |
|                                  | Total | 0.62 (0.98) | 0.42 (0.80) | 0.43 (0.67) | 0.41 (0.73) |        |     |
| <b>Joint pain frequency</b>      | 1:1   | 0.67 (0.94) | 0.56 (1.14) | 0.61 (1.01) | 0.57 (0.92) | 0.460  |     |
|                                  | 4:1   | 0.88 (1.25) | 0.51 (0.88) | 0.71 (1.20) | 0.75 (0.96) |        |     |
|                                  | Total | 0.78 (1.11) | 0.53 (1.01) | 0.66 (1.10) | 0.66 (0.93) |        |     |
| <b>Joint pain severity</b>       | 1:1   | 0.48 (0.74) | 0.43 (0.68) | 0.52 (0.78) | 0.35 (0.48) | 0.286  |     |
|                                  | 4:1   | 0.73 (0.98) | 0.43 (0.82) | 0.48 (0.81) | 0.64 (0.86) |        |     |
|                                  | Total | 0.61 (0.88) | 0.43 (0.75) | 0.50 (0.79) | 0.50 (0.71) |        |     |
| <b>Joint pain interference</b>   | 1:1   | 0.43 (0.97) | 0.24 (0.54) | 0.48 (0.75) | 0.21 (0.41) | 0.0203 |     |
|                                  | 4:1   | 0.69 (1.17) | 0.35 (0.77) | 0.45 (0.85) | 0.46 (0.79) |        |     |
|                                  | Total | 0.56 (1.08) | 0.30 (0.67) | 0.47 (0.80) | 0.33 (0.64) |        |     |
| <b>Insomnia severity</b>         | 1:1   | 0.68 (1.08) | 0.37 (0.72) | 0.32 (0.53) | 0.35 (0.62) | 0.011  | 4:1 |
|                                  | 4:1   | 1.45 (1.31) | 0.64 (0.87) | 0.51 (0.78) | 0.46 (0.69) |        |     |
|                                  | Total | 1.07 (1.25) | 0.51 (0.80) | 0.42 (0.67) | 0.41 (0.65) |        |     |
| <b>Insomnia frequency</b>        | 1:1   | 0.58 (0.86) | 0.37 (0.68) | 0.41 (0.65) | 0.28 (0.53) | 0.076  | 4:1 |
|                                  | 4:1   | 1.11 (1.17) | 0.56 (0.88) | 0.45 (0.78) | 0.42 (0.69) |        |     |

|                                 |       |             |             |             |             |       |     |
|---------------------------------|-------|-------------|-------------|-------------|-------------|-------|-----|
|                                 | Total | 0.85 (1.06) | 0.47 (0.79) | 0.43 (0.71) | 0.35 (0.61) |       |     |
| <b>Fatigue severity</b>         | 1:1   | 1.35 (1.02) | 1.24 (1.21) | 1.32 (1.14) | 1.17 (0.94) | 0.051 | 4:1 |
|                                 | 4:1   | 1.78 (1.27) | 1.61 (1.06) | 1.60 (1.21) | 1.40 (1.15) |       |     |
|                                 | Total | 1.57 (1.57) | 1.43 (1.14) | 1.46 (1.18) | 1.29 (1.04) |       |     |
| <b>Fatigue interference</b>     | 1:1   | 1.17 (0.97) | 1.02 (1.25) | 1.23 (1.18) | 0.96 (0.92) | 0.146 |     |
|                                 | 4:1   | 1.52 (1.29) | 1.23 (1.13) | 1.51 (1.24) | 1.14 (1.23) |       |     |
|                                 | Total | 1.34 (1.15) | 1.13 (1.19) | 1.37 (1.21) | 1.05 (1.07) |       |     |
| <b>Anxiety frequency</b>        | 1:1   | 1.12 (1.17) | 0.86 (1.00) | 1.06 (1.05) | 1.07 (1.05) | 0.871 |     |
|                                 | 4:1   | 1.33 (1.24) | 0.82 (0.84) | 1.02 (0.98) | 0.96 (0.87) |       |     |
|                                 | Total | 1.27 (1.20) | 0.84 (0.91) | 1.04 (1.01) | 1.01 (0.96) |       |     |
| <b>Anxiety severity</b>         | 1:1   | 0.73 (0.86) | 0.52 (0.68) | 0.79 (0.88) | 0.78 (0.83) | 0.240 |     |
|                                 | 4:1   | 1.04 (1.03) | 0.60 (0.70) | 0.94 (0.95) | 0.78 (0.78) |       |     |
|                                 | Total | 0.89 (0.96) | 0.56 (0.69) | 0.86 (0.91) | 0.78 (0.80) |       |     |
| <b>Anxiety interference</b>     | 1:1   | 0.53 (0.77) | 0.28 (0.51) | 0.38 (0.69) | 0.35 (0.55) | 0.289 |     |
|                                 | 4:1   | 0.76 (1.00) | 0.32 (0.57) | 0.48 (0.65) | 0.35 (0.62) |       |     |
|                                 | Total | 0.65 (0.90) | 0.30 (0.54) | 0.43 (0.67) | 0.35 (0.58) |       |     |
| <b>Discouraged frequency</b>    | 1:1   | 0.82 (0.97) | 0.57 (0.91) | 0.67 (0.91) | 0.82 (0.86) | 0.488 |     |
|                                 | 4:1   | 0.88 (1.06) | 0.37 (0.54) | 0.54 (0.78) | 0.53 (0.74) |       |     |
|                                 | Total | 0.85 (1.01) | 0.47 (0.75) | 0.60 (0.84) | 0.67 (0.81) |       |     |
| <b>Discouraged severity</b>     | 1:1   | 0.65 (0.79) | 0.32 (0.62) | 0.52 (0.82) | 0.66 (0.73) | 0.892 |     |
|                                 | 4:1   | 0.66 (0.90) | 0.32 (0.47) | 0.54 (0.81) | 0.46 (0.63) |       |     |
|                                 | Total | 0.66 (0.84) | 0.32 (0.54) | 0.53 (0.81) | 0.56 (0.68) |       |     |
| <b>Discouraged interference</b> | 1:1   | 0.43 (0.70) | 0.21 (0.58) | 0.54 (0.83) | 0.37 (0.56) | 0.619 |     |
|                                 | 4:1   | 0.57 (0.85) | 0.32 (0.61) | 0.37 (0.59) | 0.39 (0.68) |       |     |
|                                 | Total | 0.50 (0.78) | 0.27 (0.59) | 0.45 (0.72) | 0.38 (0.62) |       |     |
| <b>Sad frequency</b>            | 1:1   | 1.29 (1.10) | 0.97 (0.94) | 2.26 (7.08) | 1.07 (0.93) | 0.237 |     |
|                                 | 4:1   | 1.14 (0.92) | 0.94 (0.82) | 1.00 (0.93) | 0.71 (0.80) |       |     |
|                                 | Total | 1.21 (1.01) | 0.96 (0.88) | 1.62 (5.02) | 0.89 (0.88) |       |     |
| <b>Sad severity</b>             | 1:1   | 1.02 (0.96) | 0.70 (0.81) | 0.94 (0.88) | 0.82 (0.72) | 0.799 |     |
|                                 | 4:1   | 0.97 (0.84) | 0.82 (0.84) | 0.74 (0.78) | 0.64 (0.73) |       |     |
|                                 | Total | 1.00 (0.89) | 0.76 (0.82) | 0.84 (0.83) | 0.73 (0.72) |       |     |
| <b>Sad interference</b>         | 1:1   | 0.51 (0.74) | 0.43 (0.76) | 0.50 (0.82) | 0.50 (0.63) | 0.903 |     |
|                                 | 4:1   | 0.61 (0.69) | 0.40 (0.74) | 0.38 (0.60) | 0.39 (0.73) |       |     |
|                                 | Total | 0.56 (0.71) | 0.41 (0.74) | 0.44 (0.72) | 0.44 (0.68) |       |     |
| <b>Bruising</b>                 | 1:1   | 0.17 (0.38) | 0.13 (0.34) | 0.17 (0.38) | 0.17 (0.39) | 0.064 | 4:1 |
|                                 | 4:1   | 0.35 (0.48) | 0.17 (0.38) | 0.34 (0.53) | 0.25 (0.44) |       |     |

|                                 |       |             |             |             |             |       |     |
|---------------------------------|-------|-------------|-------------|-------------|-------------|-------|-----|
|                                 | Total | 0.26 (0.44) | 0.15 (0.36) | 0.26 (0.47) | 0.21 (0.41) |       |     |
| <b>Chills frequency</b>         | 1:1   | 0.29 (0.67) | 0.18 (0.60) | 0.50 (0.96) | 0.39 (0.78) | 0.187 |     |
|                                 | 4:1   | 0.51 (0.84) | 0.37 (0.83) | 0.42 (0.69) | 0.71 (1.04) |       |     |
|                                 | Total | 0.40 (0.76) | 0.28 (0.73) | 0.46 (0.83) | 0.55 (0.93) |       |     |
| <b>Chills severity</b>          | 1:1   | 0.17 (0.38) | 0.08 (0.27) | 0.38 (0.73) | 0.42 (0.69) | 0.189 |     |
|                                 | 4:1   | 0.36 (0.62) | 0.22 (0.57) | 0.26 (0.51) | 0.67 (0.90) |       |     |
|                                 | Total | 0.26 (0.52) | 0.15 (0.46) | 0.32 (0.63) | 0.55 (0.80) |       |     |
| <b>Sweating frequency</b>       | 1:1   | 0.43 (0.80) | 0.28 (0.73) | 0.33 (0.54) | 0.14 (0.44) | 0.472 |     |
|                                 | 4:1   | 0.52 (1.03) | 0.25 (0.63) | 0.28 (0.62) | 0.50 (0.83) |       |     |
|                                 | Total | 0.48 (0.92) | 0.27 (0.68) | 0.30 (0.57) | 0.32 (0.69) |       |     |
| <b>Sweating severity</b>        | 1:1   | 0.29 (0.60) | 0.20 (0.52) | 0.34 (0.54) | 0.07 (0.26) | 0.470 |     |
|                                 | 4:1   | 0.41 (0.86) | 0.25 (0.63) | 0.25 (0.64) | 0.35 (0.62) |       |     |
|                                 | Total | 0.35 (0.74) | 0.22 (0.57) | 0.29 (0.59) | 0.21 (0.49) |       |     |
| <b>Decreased sweating</b>       | 1:1   | 0.00 (0.00) | 0.00 (0.00) | 0.03 (0.17) | 0.00 (0.00) | 0.069 | 4:1 |
|                                 | 4:1   | 0.07 (0.34) | 0.12 (0.64) | 0.02 (0.16) | 0.10 (0.56) |       |     |
|                                 | Total | 0.03 (0.24) | 0.06 (0.46) | 0.02 (0.17) | 0.05 (0.40) |       |     |
| <b>Hot flashes frequency</b>    | 1:1   | 0.17 (0.54) | 0.20 (0.61) | 0.18 (0.52) | 0.17 (0.61) | 0.171 |     |
|                                 | 4:1   | 0.47 (0.89) | 0.40 (0.81) | 0.22 (0.63) | 0.39 (0.78) |       |     |
|                                 | Total | 0.32 (0.75) | 0.30 (0.72) | 0.20 (0.58) | 0.28 (0.70) |       |     |
| <b>Hot flashes interference</b> | 1:1   | 0.17 (0.62) | 0.13 (0.41) | 0.12 (0.41) | 0.14 (0.45) | 0.334 |     |
|                                 | 4:1   | 0.33 (0.65) | 0.25 (0.58) | 0.22 (0.63) | 0.25 (0.51) |       |     |
|                                 | Total | 0.25 (0.64) | 0.19 (0.51) | 0.17 (0.54) | 0.20 (0.48) |       |     |
| <b>Nose bleeds frequency</b>    | 1:1   | 0.02 (0.15) | 0.02 (0.16) | 0.00 (0.00) | 0.03 (0.18) | 0.049 | 4:1 |
|                                 | 4:1   | 0.14 (0.35) | 0.12 (0.40) | 0.13 (0.42) | 0.03 (0.18) |       |     |
|                                 | Total | 0.08 (0.27) | 0.07 (0.31) | 0.07 (0.31) | 0.03 (0.18) |       |     |
| <b>Nose bleeds severity</b>     | 1:1   | 0.02 (0.15) | 0.02 (0.16) | 0.00 (0.00) | 0.03 (0.18) | 0.108 |     |
|                                 | 4:1   | 0.11 (0.32) | 0.07 (0.26) | 0.11 (0.32) | 0.03 (0.18) |       |     |
|                                 | Total | 0.07 (0.26) | 0.05 (0.22) | 0.05 (0.23) | 0.03 (0.18) |       |     |
| <b>Pain and swelling</b>        | 1:1   | 0.00 (0.00) | 0.43 (1.04) | 0.66 (1.19) | 0.82 (1.30) | 0.755 |     |
|                                 | 4:1   | 0.00 (0.00) | 0.45 (1.03) | 0.55 (1.05) | 0.71 (1.24) |       |     |
|                                 | Total | 0.00 (0.00) | 0.44 (1.03) | 0.60 (1.11) | 0.76 (1.26) |       |     |
| <b>Body odour</b>               | 1:1   | 0.26 (0.59) | 0.25 (0.59) | 0.39 (0.70) | 0.25 (0.51) | 0.740 |     |
|                                 | 4:1   | 0.23 (0.48) | 0.45 (0.67) | 0.25 (0.55) | 0.25 (0.44) |       |     |
|                                 | Total | 0.25 (0.53) | 0.35 (0.64) | 0.31 (0.62) | 0.25 (0.47) |       |     |
